# Supplementary material for: Upregulation of CD14 in mesenchymal stromal cells accelerates lipopolysaccharide-induced response and enhances antibacterial properties
Source: PubMed Central journal article supplement (PMC8814754; doi:10.1016/j.isci.2022.103759), 2022-01-12
Supplement: mmc1.pdf [file mmc1.pdf]

iScience, Volume 25

## **Supplemental information**

### **Upregulation of CD14 in mesenchymal stromal cells accelerates lipopolysaccharide-induced response and enhances antibacterial properties**

**Matthew P. Hirakawa, Nikki Tjahjono, Yooli K. Light, Aleyna N. Celebi, Nisa N. Celebi, Prem Chintalapudi, Kimberly S. Butler, Steven S. Branda, and Raga Krishnakumar**

1

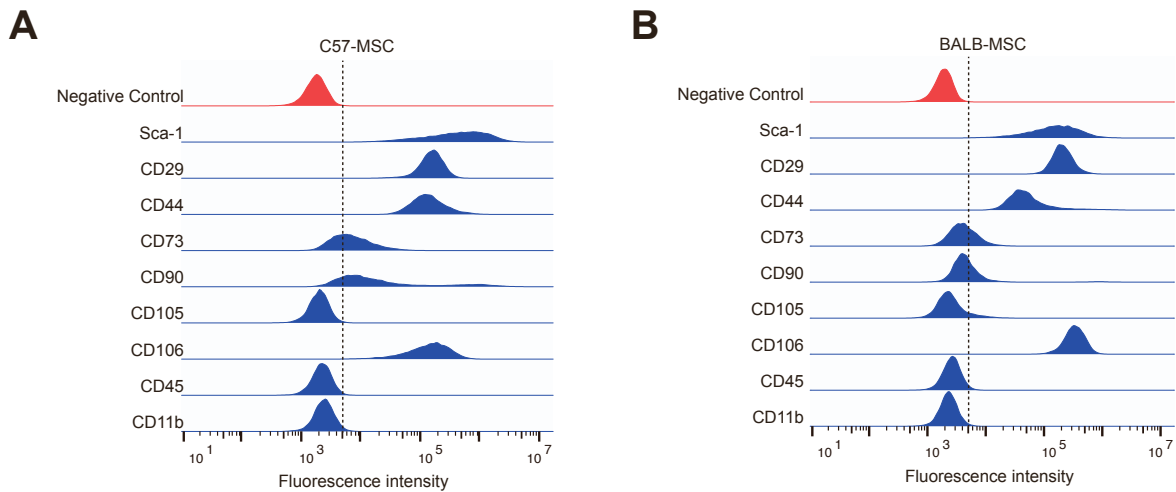

2

3 **Figure S1. Analysis of traditional MSC cell-surface markers in different MSC types,**

4 **related to Figure 1.** Cells were inspected for the expression of MSC cell-surface markers

5 by immunostaining with the Mouse Mesenchymal Marker Antibody Panel (R&D Systems)

6 followed by flow cytometry. Both **(A)** C57-MSCs and **(B)** BALB-MSCs stained positively

7 (>99% of cells) for the MSC markers Sca-1, CD29, CD44 and CD106. The MSC markers

8 CD73 and CD90 were observed only in subsets of cells analyzed indicating population

9 heterogeneity that has been observed with these proteins in MSCs. C57-MSCs and

10 BALB-MSCs exhibited negative or low staining of CD105, respectively, and

11 subpopulations of CD105-negative MSCs have also been previously characterized. The

12 negative MSC markers, CD45 and CD11b, were not detected in either C57-MSC or

13 BALB-MSCs. Plots shown are one representative of three independent experiments.

14

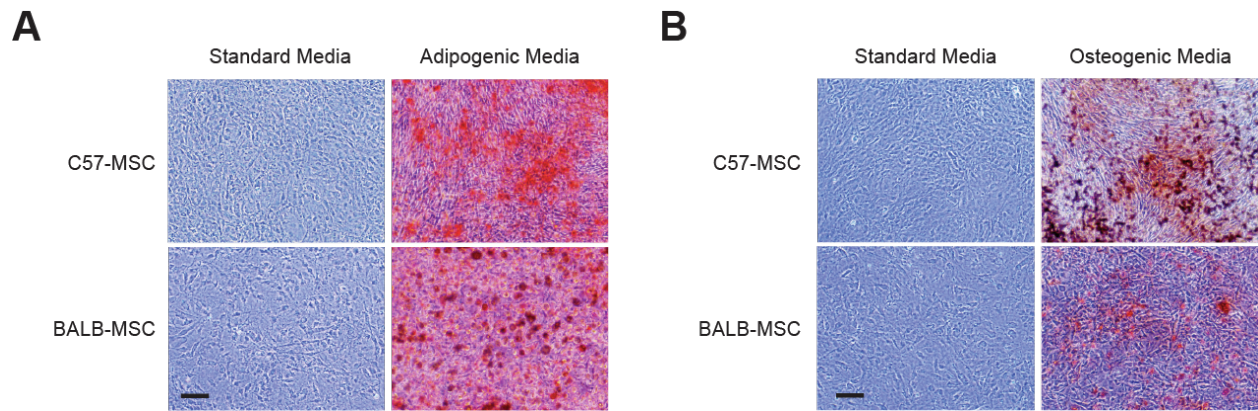

15

16 **Figure S2. MSC differentiation assays, related to Figure 1.** C57-MSCs and BALB-  
 17 MSCs were tested for their ability to differentiate using **(A)** adipogenic and **(B)** osteogenic  
 18 assays (Cyagen, Inc). Using this approach, we observed both cell types to be capable of  
 19 adipogenesis and osteogenesis as visualized by Oil Red O and Alizarin Red S staining,  
 20 respectively (Scale bars = 200 μm). Images shown are representative of at least 3  
 21 independent experiments.

22

23

24

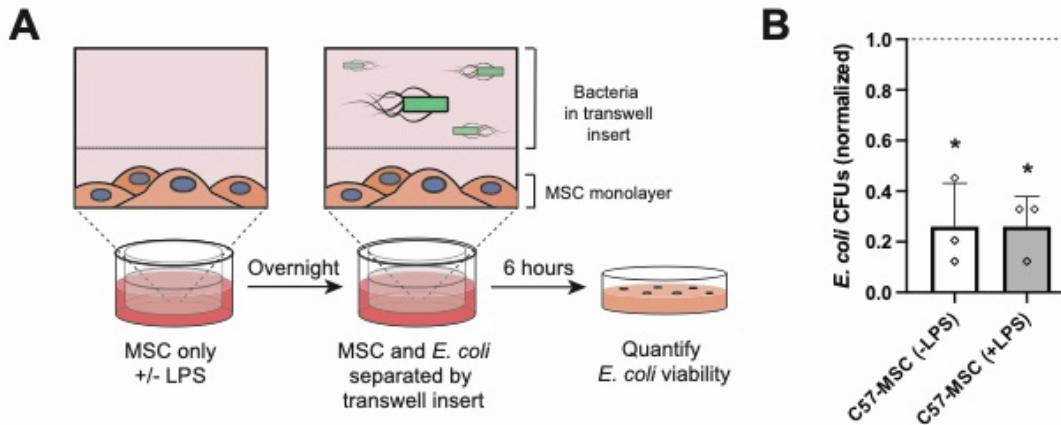

25

26

27 **Figure S3. Antibacterial assays with physical separation of MSCs and *E. coli*,**

28 **related to Figure 1.** To test if MSCs needed to be in direct contact with bacteria to inhibit

29 bacterial growth, antibacterial assays were performed using transwell inserts to physically

30 separate *E. coli* from MSCs. **(A)** These experiments were performed like those in Figure

31 1, however *E. coli* were added to the upper chamber of a transwell insert so they could

32 not directly contact MSCs in the bottom section of the well. **(B)** *E. coli* abundance was

33 quantified using CFU assays after 6-hrs incubation in the transwell inserts, and

34 normalized to CFU values of *E. coli* controls grown in identical transwell systems but in

35 monoculture. Here, we observed that MSCs inhibited *E. coli* growth with and without

36 LPS-priming when compared to a control with media only ( $p = 0.03$  and  $p = 0.04$ ,

37 respectively). Bars depict the mean with error bars representing SD, statistical

38 significance was determined using t-test on three biological replicates, and \* represents

39  $p < 0.05$ .

40

41

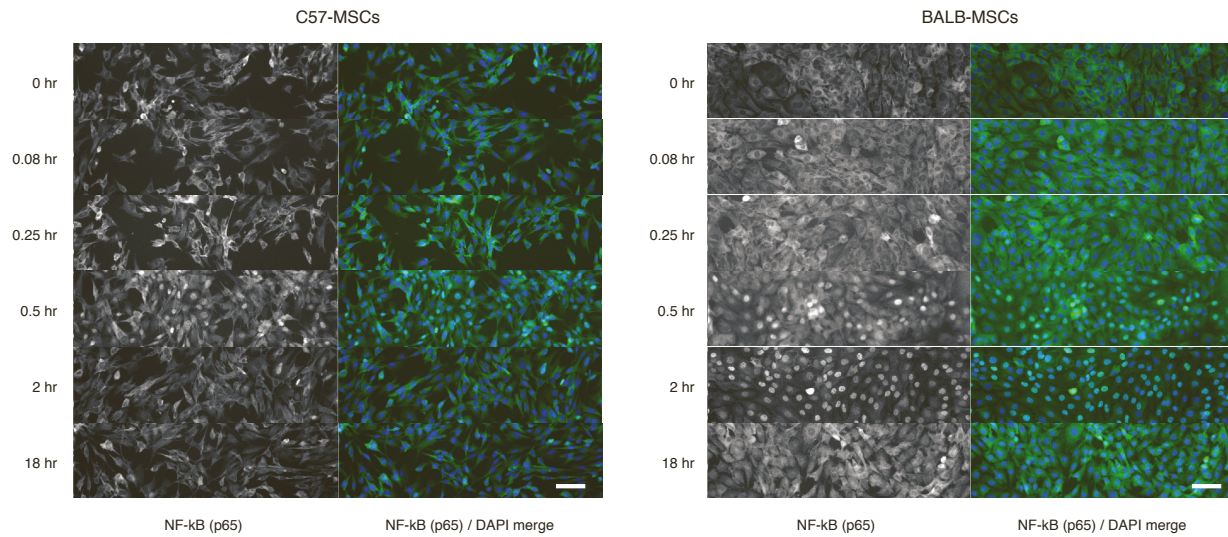

43

44

45 **Figure S4. Time-course microscopy of NF-κB nuclear translocation in MSCs after**46 **LPS stimulation, related to Figure 2.** Representative images depicting NF-κB

47 localization in C57-MSCs (left) and BALB-MSCs (right) at six time points after LPS

48 exposure (0.083 hr, 0.25 hr, 0.5 hr, 1 hr, 2 hrs, and 18 hrs). To visualize NF-κB

49 localization, MSCs were fixed with paraformaldehyde and stained using an NF-κB p65

50 (L8F6) mouse primary antibody and Alexa Flour 488 secondary antibody. To visualize

51 MSC nuclei, the cells were stained with DAPI. Cells were imaged and analyzed using a

52 CellInsight CX7 High-Content Imager (scale bars = 50 μm). The maximum nuclear

53 localization of NF-κB was observed at 0.5 hrs in C57-MSCs and 2 hrs in BALB-MSCs

54 (see Figure 2A for quantification data, and the materials and methods section for more

55 details on the imaging and quantification procedure).

56

57

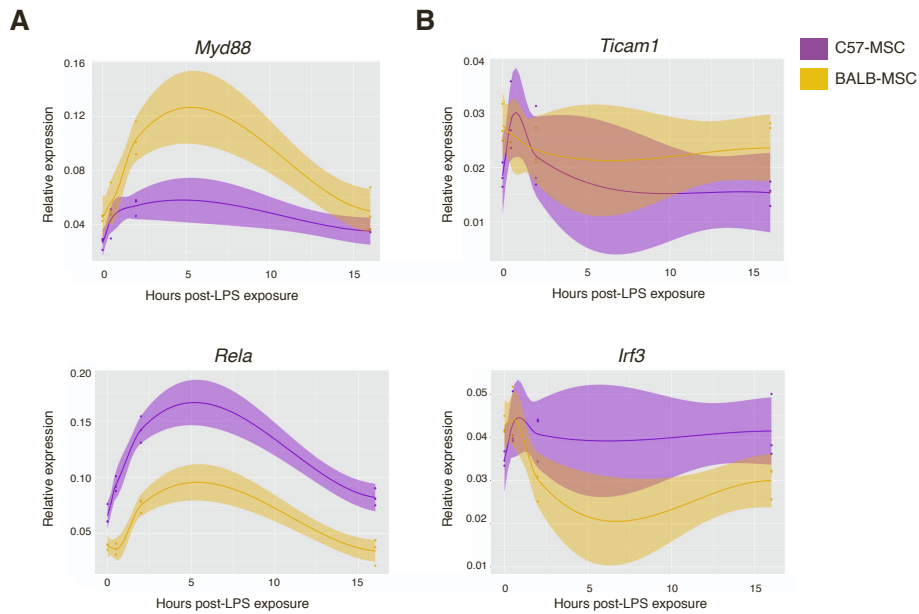

59

60 **Figure S5. Gene expression changes of TLR4-adapter genes and target**  
 61 **transcription factors in response to LPS, related to Figure 2.** To serve as an internal  
 62 control for gene induction in response to LPS, the relative expression levels (FPKM) of  
 63 genes involved with the **(A)** MYD88-dependent and **(B)** MYD88-independent TLR4  
 64 signaling pathways were examined at different timepoints using RNA-seq. At 2-hrs post  
 65 LPS exposure, we observed significant upregulation of *Myd88* in C57-MSCs and BALB-  
 66 MSCs compared to unstimulated cells ( $p_{adj} = 1.05E-06$  and  $3.97E-18$ , respectively).  
 67 Similarly, we observed significant upregulation of *Rela* in both C57-MSCs and BALB-  
 68 MSCs compared to unstimulated cells ( $p_{adj} = 6.39E-13$  and  $2.16E-17$ , respectively).  
 69 Alternatively, we did not observe upregulation of *Ticam1* or *Irf3* in response to LPS in  
 70 either C57-MSCs or BALB-MSCs suggesting these cells may be responding to LPS  
 71 through a MYD88-dependent pathway.

72

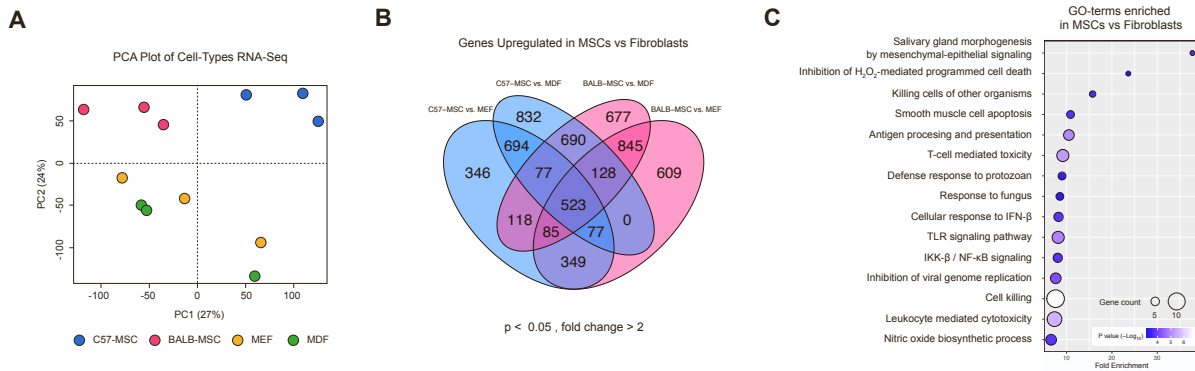

73

74 **Figure S6. Transcriptional differences between MSCs and fibroblasts, related to**

75 **Figure 3. (A)** PCA plot depicting transcriptional profiles using RNA-seq of C57-MSCs,

76 BALB-MSCs, MEFs and MDFs under standard growth conditions. **(B)** Venn diagram

77 showing numbers of genes upregulated in pairwise comparisons of MSCs vs fibroblasts

78 (upregulated genes were defined as having a fold change > 2 and an adjusted P < 0.05).

79 The center overlapping area of 523 genes represented shared upregulated genes

80 between both MSC types when compared to both fibroblasts. **(C)** These MSC-specific

81 genes were then inspected for functional enrichment using GO-term analysis. The most

82 functionally enriched GO category involved the regulation of branching involved in

83 salivary gland morphogenesis by mesenchymal-epithelial signaling (GO:0060665), which

84 was a result of upregulation of Fgf7, Hgf, and Met. Of particular note, MSCs were

85 enriched for the TLR-signaling pathway (GO:0002224) that included higher expression of

86 genes involved with responding to bacterial PAMPs including Lbp, Tlr2 and Irf1.

87 Additionally, MSCs were enriched for the genes involved with cell killing (GO:0031341)

88 which included chemokines (Cxcl1 and Cxcl5), MHC genes (H2-BI, H2-T22, H2-Q6, H2-

89 Q2, H2-K1), as well as pro-apoptotic genes (Stat5a, Bcl2l11, Gapdh, Arrb2).

90

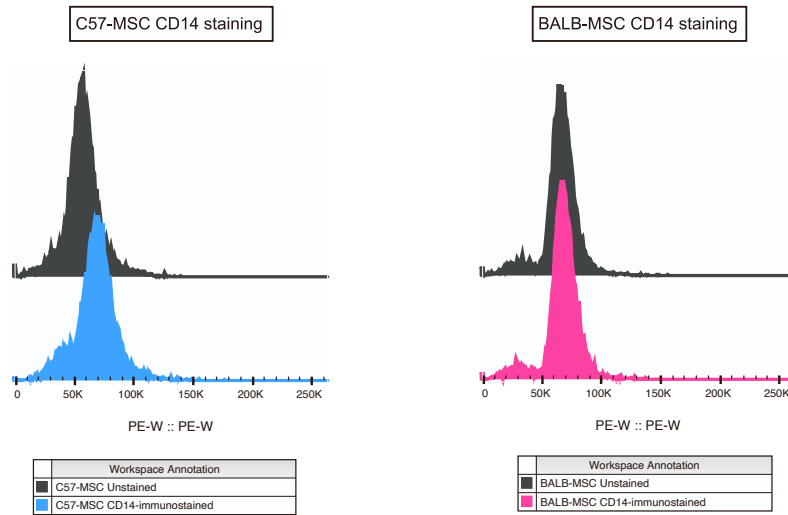

91  
 92 **Figure S7. CD14 immunostaining in C57-MSCs and BALB-MSCs, related to Figure**  
 93 **4.** Both MSC types were live-stained using a PE conjugated anti-mouse CD14 antibody  
 94 and expression levels were measured using flow cytometry. The mean fluorescence  
 95 intensity (MFI) of immunostained MSCs was compared to MFIs from respective unstained  
 96 controls. Using this approach, we observed increased fluorescence intensity of C57-  
 97 MSCs stained with CD14 when compared to their unstained controls (MFI = 68198 vs.  
 98 57669, respectively), indicating the presence of CD14 protein expression. Alternatively,  
 99 the BALB-MSCs stained with CD14 were more similar to their unstained controls (MFI =  
 100 67100 vs. 65679, respectively), indicating these cells have extremely low or absent CD14  
 101 expression. Results shown are one representative of three independent experiments.



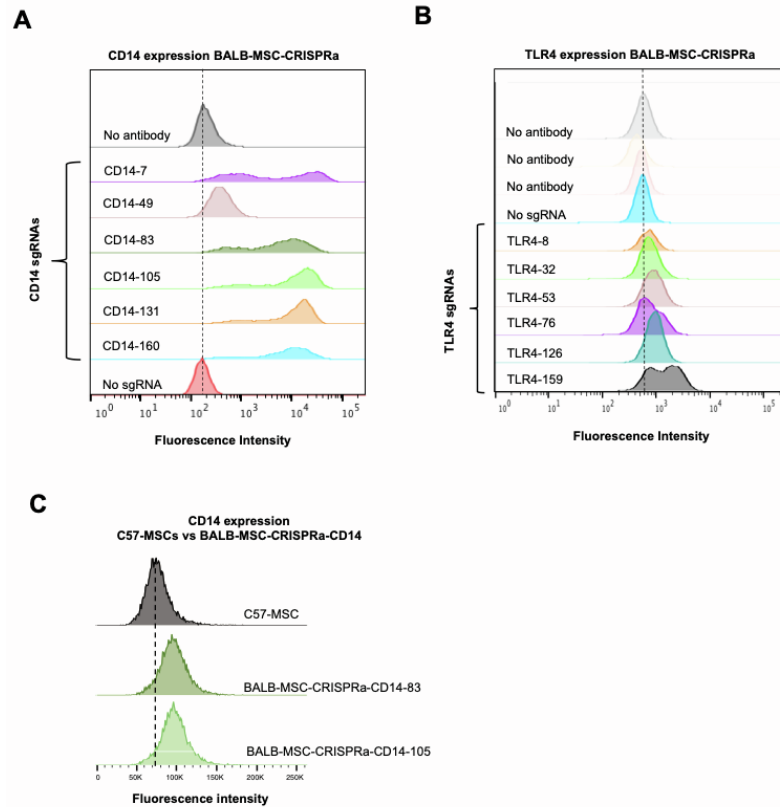

102  
 103 **Figure S8. Comparison of sgRNAs to activate protein expression in BALB-MSC-**  
 104 **CRISPRa cells, related to Figure 5.** BALB-MSCs expressing the CRISPRa SAM system  
 105 were transduced with lentiviral constructs to express one of six sgRNAs that target either  
 106 **(A)** CD14 of **(B)** TLR4. Each sgRNA was designed to target a different distance upstream  
 107 of the transcription start site (represented by the number after the gene name). MSCs  
 108 were live-stained using anti-CD14-PE or anti-TLR4-APC antibodies and examined for  
 109 fluorescence intensity using flow cytometry. Negative controls used here were BALB-  
 110 MSC-CRISPRa not expressing sgRNA with no antibody staining (labeled no antibody), or  
 111 the same cells treated with antibody (labeled no sgRNA). **(C)** The two sgRNAs that were  
 112 selected for subsequent experiments were additionally tested for CD14 expression levels  
 113 when directly compared to wildtype C57-MSCs. In these experiments, we observed the  
 114 BALB-MSC-CRISPRa-CD14 cells to exhibit slightly elevated CD14 expression compared

115 to C57-MSCs. Plots shown are representative staining of one of three independent  
116 experiments.

117

118

A

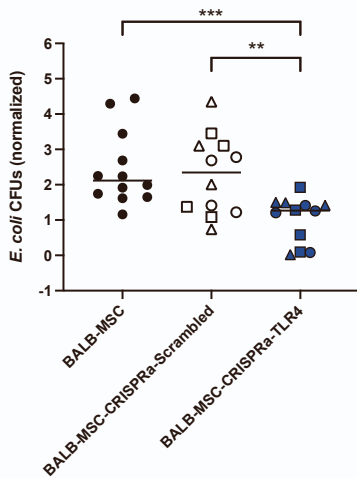

B

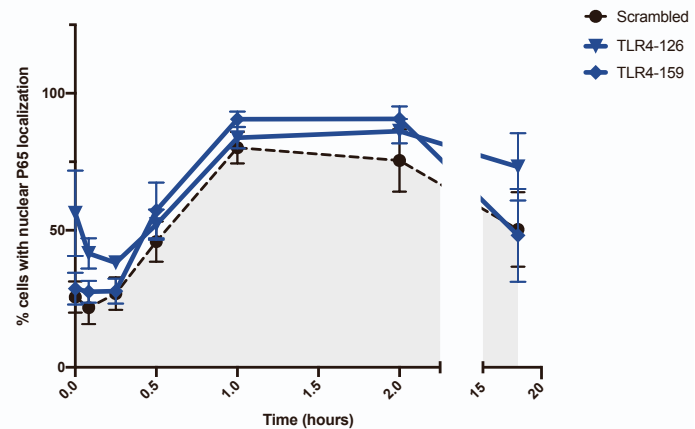

119

120 **Figure S9. Functional analysis of TLR4 overexpression in BALB-MSCs, related to**121 **Figure 5. (A)** BALB-MSCs overexpressing TLR4 were examined for their antibacterial122 properties by co-culturing these MSCs with *E. coli* for 6 hours and measuring the CFUs

123 in the media (For scrambled sgRNAs: circle = non-targeting\_control\_1, square = non-

124 targeting\_control\_2, triangle = non-targeting\_control\_3; For TLR4 sgRNAs: circle =

125 TLR4-53, square = TLR4-126, triangle = TLR4-159). CFUs were normalized to a

126 corresponding *E. coli* monoculture control performed alongside each biological replicate,

127 and statistical significance was determined using t-test (Lines reference the median, and

128 statistical significance is represented by \*\*  $P < 0.01$ , \*\*\*  $P < 0.001$ ). **(B)** BALB-MSC-129 CRISPRa-TLR4 cells were also inspected for their rates of NF- $\kappa$ B nuclear translocation

130 after LPS-exposure compared to cells expressing a non-targeting “Scrambled” control.

131 Overexpression of *Tlr4* did not lead to a change in NF- $\kappa$ B nuclear translocation rates in

132 these cells. Data points represent the mean of at least 3 biological replicates, and error

133 bars represent SEM.

134

135

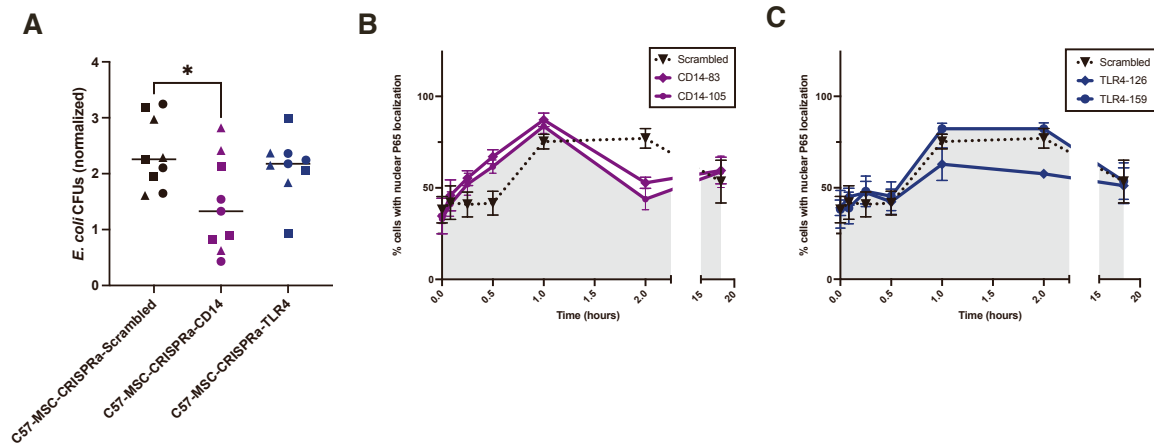

137

138 **Figure S10. Antibacterial activity and LPS-response kinetics in C57-MSCs with**139 **upregulated *Cd14* or *Tlr4*, related to Figure 5. (A) C57-MSCs overexpressing *Cd14* or**140 ***Tlr4* via CRISPRa SAM system were examined for antibacterial properties by co-culturing**141 **with *E. coli* for 6 hours and measuring the CFUs in the media (For scrambled sgRNAs:**142 **circle = non-targeting sgRNA 1, square = non-targeting sgRNA 2, triangle = non-targeting**143 **sgRNA 3; For CD14 sgRNAs: circle = CD14-83, square = CD14-105, triangle = CD14-**144 **131; For TLR4 sgRNAs: circle = TLR4-53, square = TLR4-126, triangle = TLR4-159).**145 **CFUs were normalized to a corresponding ‘media only’ control performed alongside each**146 **biological replicate (Lines reference the median, and statistical significance is represented**147 **by \*,  $p < 0.05$ ). (B) NF- $\kappa$ B nuclear translocation assays in C57-MSC-CRISPRa-CD14**148 **cells after LPS-exposure. We observed a significant increase in nuclear NF- $\kappa$ B at 2-hrs**149 **post LPS-exposure in C57-MSC-CRISPRa-CD14 when compared to cells expressing a**150 **non-targeting scrambled sgRNA (Data points represent mean with error bars +/- SEM, n**151 **= 3 biological replicates,  $p < 0.05$ ). (C) NF- $\kappa$ B nuclear translocation assays were also**152 **performed in C57-MSC-CRISPRa-TLR4, however there was no significant difference**

153 observed when these cells were compared to cells expressing a scrambled control (Data  
154 points represent mean with error bars +/- SEM, n = 3 biological replicates).

155

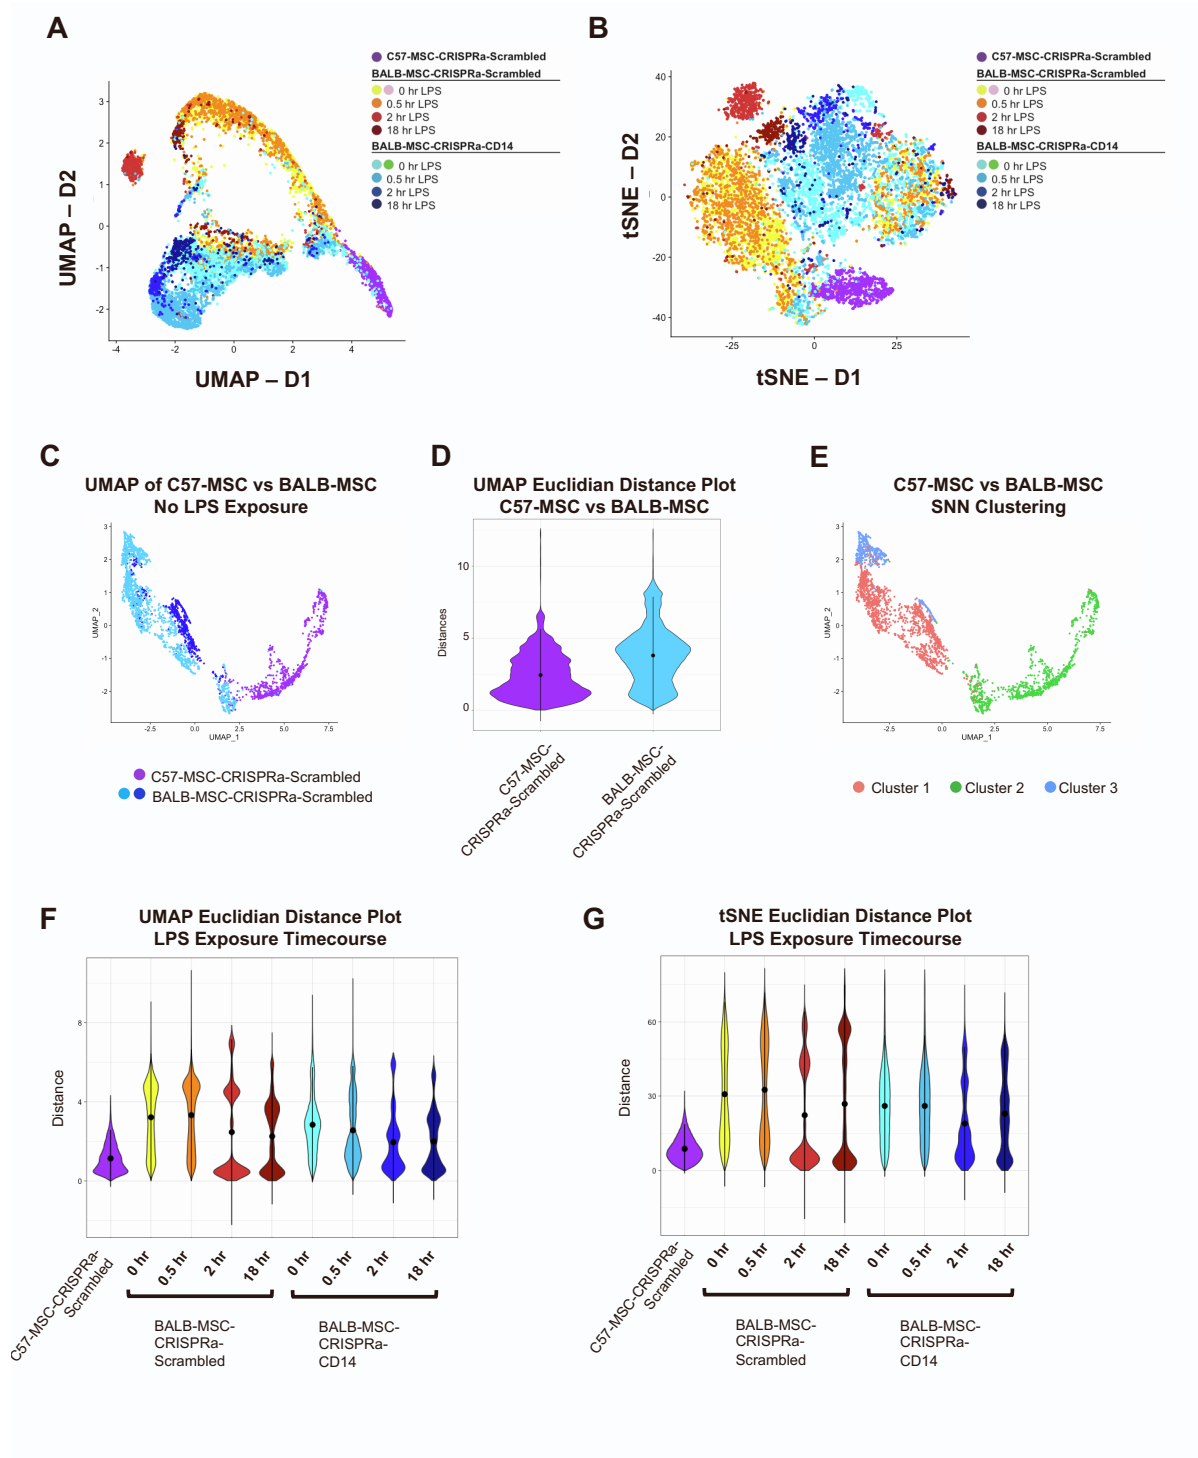

157

158

159 **Figure S11. Single-cell RNA-seq visualizations and Euclidean distance plots,**

160 **related to Figure 5. (A and B) Population structure visualization of single-cell RNA-seq**

161 **profiles from MSCs during LPS-exposure time course using UMAP and tSNE**

162 dimensionality reduction methods. **(C)** UMAP plot depicting single cell transcriptional  
163 profiles of untreated C57-MSC-CRISPRa-Scrambled and BALB-MSC-CRISPRa-  
164 Scrambled cells distribution of transcriptomic cell states without LPS treatment or CD14  
165 addition. **(D)** Violin plot depicting pairwise n-dimensional Euclidian distances (with n being  
166 number of genes) between all cells in the UMAP projection from panel C within each cell  
167 type. A Kruskal-Wallis non-parametric rank sum test shows a significance of  $p < 2.2e-16$   
168 with a chi-squared statistic of 141984, suggesting that C57-MSCs have more closely  
169 related transcriptional profiles within the population compared to BALB-  
170 MSCs. **(E)** Seurat's shared nearest neighbors (SNN) algorithm was used to identify  
171 clusters of cells. Using a resolution value set at 0.1 we observed all C57-MSCs clustered  
172 together and BALB-MSCs were spread across three clusters (with some cells overlapping  
173 with the C57-MSC cluster). **(F and G)** Violin plot depicting pairwise n-dimensional  
174 Euclidian distances during LPS-exposure between members of the same experimental  
175 sample for both **(F)** UMAP **(G)** tSNE approaches.

176

| Primer Name                | Sequence                   |
|----------------------------|----------------------------|
| CD14-7-F                   | CACCGGTACGCACCAGACAAGTCCG  |
| CD14-7-R                   | AAACCGGACTTGTCTGGTGCGTACC  |
| CD14-49-F                  | CACCGGAATAATGATCTAAGGCACT  |
| CD14-49-R                  | AAACAGTGCCTTAGATCATTATTCC  |
| CD14-83-F                  | CACCGGAAAATGGAGGTGAATCAAT  |
| CD14-83-R                  | AAACATTGATTACCTCCATTTTCC   |
| CD14-105-F                 | CACCGTTGCTAGCAACTAAGACTAG  |
| CD14-105-R                 | AAACCTAGTCTTAGTTGCTAGCAAC  |
| CD14-131-F                 | CACCGAAGAGCTGGATTTGAACGGT  |
| CD14-131-R                 | AAACACCGTTCAAATCCAGCTCTTC  |
| CD14-160-F                 | CACCGTGAATGTAATTGGACATTTG  |
| CD14-160-R                 | AAACCAAATGTCCAATTACATTCAC  |
| TLR4-8-F                   | CACCGCAGATCGTCATGTTCTCTCA  |
| TLR4-8-R                   | AAACTGAGAGAACATGACGATCTGC  |
| TLR4-32-F                  | CACCGTGGTGGCAGCGCAGAGTCCC  |
| TLR4-32-R                  | AAACGGGACTCTGCGCTGCCACCAC  |
| TLR4-53-F                  | CACCGAGGGAAGAGGCAGGTGTCCC  |
| TLR4-53-R                  | AAACGGGACACCTGCCTCTTCCCTC  |
| TLR4-76-F                  | CACCGCTTGCAGAGGGGCACCCACT  |
| TLR4-76-R                  | AAACAGTGGGTGCCCCCTCTGCAAGC |
| TLR4-126-F                 | CACCGAACCTTAGCATTCTCACTTT  |
| TLR4-126-R                 | AAACAAAGTGAGAATGCTAAGGTTT  |
| TLR4-159-F                 | CACCGGAATCGATCTGCCCCGTCGC  |
| TLR4-159-R                 | AAACGCGACGGGGCAGATCGATTCC  |
| NonTargetingControl_0001_F | CACCGGCGAGGTATTTCGGCTCCGCG |
| NonTargetingControl_0001_R | AAACCGCGGAGCCGAATACCTCGCC  |
| NonTargetingControl_0002_F | CACCGGCTTTCACGGAGGTTGACG   |
| NonTargetingControl_0002_R | AAACCGTCGAACCTCCGTGAAAGCC  |



|                            |                           |
|----------------------------|---------------------------|
| NonTargetingControl_0003_F | CACCGATGTTGCAGTTCGGCTCGAT |
|----------------------------|---------------------------|

178

179 **Table S1. Primers used in this study, related to Figure 5.**
